# Supplementary material for: The molecular evolution of genes previously associated with large sizes reveals possible pathways to cetacean gigantism
Source: PubMed Central journal article supplement (PMC9852289; doi:10.1038/s41598-022-24529-3), 2023-01-19
Supplement: 41598_2022_24529_MOESM2_ESM.pdf [file 41598_2022_24529_MOESM2_ESM.pdf]

A) EGF

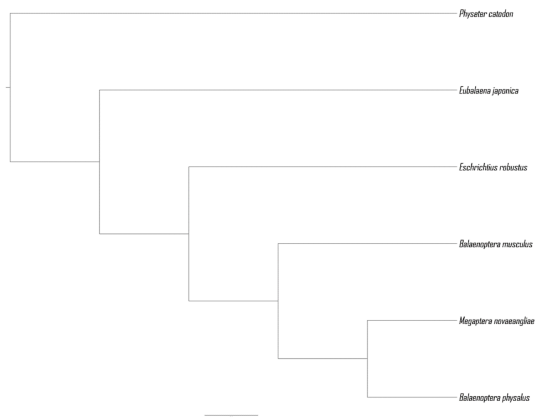

B) GHSR

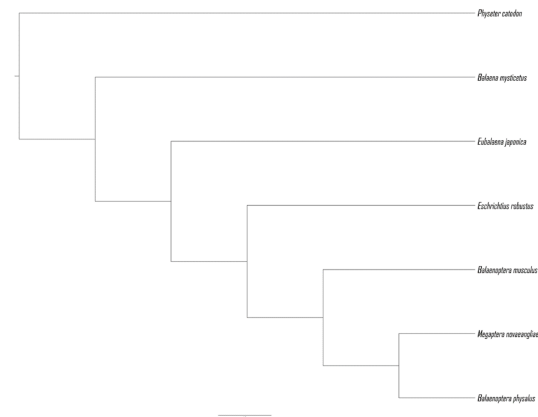

C) IGF2

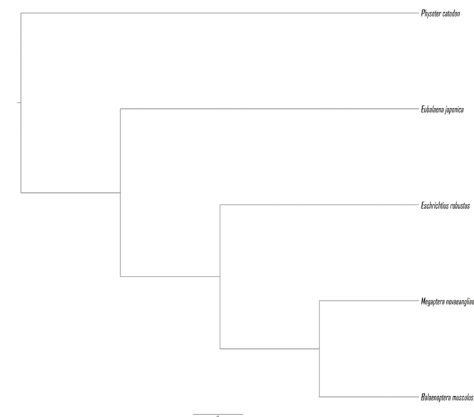

D) IGFBP2

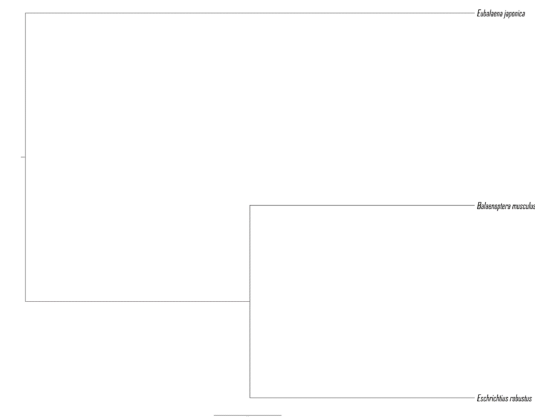

E) IGFBP7

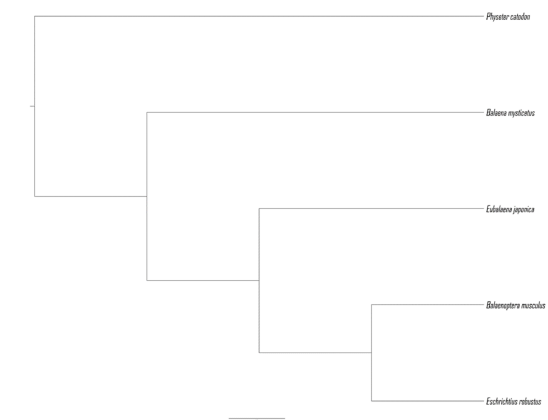

F) LCORL

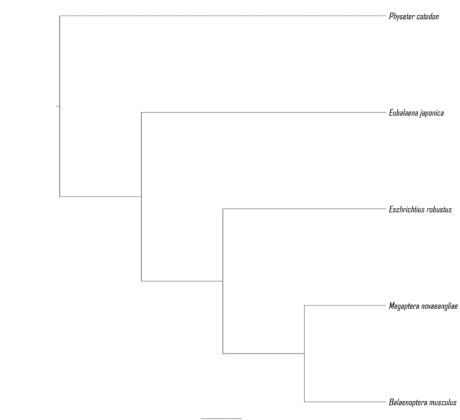

G) NCAPG

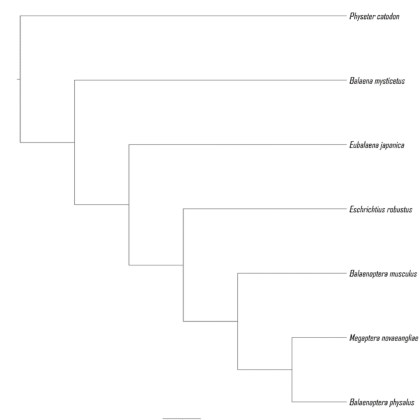

H) PLAG1

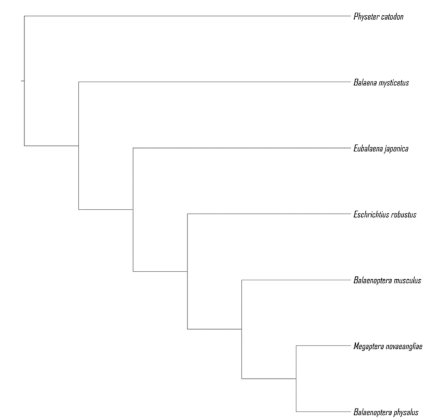

**Figure S2:** Species trees by each gene using dataset II, in which there are only giant cetaceans (larger than 10 meters).
